# Supplementary material
Source: Elsevier journal article supplement (https://www.sciencedirect.com/science/article/pii/S113014732100049X)
Supplement: mmc1 [file S113014732100049X:mmc1.pdf]

# Ética de la publicación

1. ¿Su trabajo ha comportado experimentación en animales?:

**No**

2. ¿En su trabajo intervienen pacientes o sujetos humanos?:

**No**

3. ¿Su trabajo incluye un ensayo clínico?:

**No**

4. ¿Todos los datos mostrados en las figuras y tablas incluidas en el manuscrito se recogen en el apartado de resultados y las conclusiones?:

**Sí**
